# Supplementary material for: Molecular Detection and Phylogenetic Analyses of Diverse Bartonella Species in Bat Ectoparasites Collected from Yunnan Province, China
Source: MDPI journal article supplement (doi:10.3390/pathogens11111283), 2022-11-01
Supplement: s1 [file s1]

**Table S1.** Summary of sample mixed pools and result of *Bartonella* detection

| order | POOL NO.   | HOST FAMILY            | HOST SPECIES                  | NUM | LOCATION  | DATE | PCR         |             |             |     |
|-------|------------|------------------------|-------------------------------|-----|-----------|------|-------------|-------------|-------------|-----|
|       |            |                        |                               |     |           |      | <i>gltA</i> | <i>ftsZ</i> | <i>rpoB</i> | ITS |
| 1     | YNML1/BM01 | <i>Spinturnicidae</i>  | <i>Spinturnicidae</i> sp.     | 16  | Mengla    | 2012 |             |             |             |     |
| 2     | YNML1/BM02 | <i>Spinturnicidae</i>  | <i>Spinturnicidae</i> sp.     | 17  | Mengla    | 2012 | +           | +           | +           | +   |
| 3     | YNML2/BM03 | <i>Spinturnicidae</i>  | <i>Spinturnicidae</i> sp.     | 30  | Menglian  | 2012 | +           | +           | +           | +   |
| 4     | YNML2/BM04 | <i>Spinturnicidae</i>  | <i>Spinturnicidae</i> sp.     | 25  | Menglian  | 2012 | +           | +           | +           | -   |
| 5     | YNMJ/BM05  | <i>Spinturnicidae</i>  | <i>Spinturnicidae</i> sp.     | 15  | Mojiang   | 2013 |             |             |             |     |
| 6     | YNSB/BM06  | <i>Spinturnicidae</i>  | <i>Spinturnicidae</i> sp.     | 10  | Shuangbai | 2013 | +           | +           | -           | +   |
| 7     | YNMS/BT01  | <i>Ixodidae</i>        | <i>Ixodes vespertilionis</i>  | 1   | Mangshi   | 2012 | +           | +           | +           | +   |
| 8     | YNMJ/BT02  | <i>Ixodidae</i>        | <i>Ixodes collaris</i>        | 2   | Mojiang   | 2013 |             |             |             |     |
| 9     | YNTC/BT03  | <i>Ixodidae</i>        | <i>Ixodes collaris</i>        | 2   | Tengchong | 2012 |             |             |             |     |
| 10    | YNBS/BC01  | <i>Ischnopsyllidae</i> | <i>Thaumapsylla</i> sp.       | 1   | Baoshan   | 2014 |             |             |             |     |
| 11    | YNWD/BC02  | <i>Ischnopsyllidae</i> | <i>Thaumapsylla</i> sp.       | 4   | Wanding   | 2013 | +           | +           | +           | -   |
| 12    | YNWD/BC03  | <i>Ischnopsyllidae</i> | <i>Thaumapsylla</i> sp.       | 16  | Wanding   | 2014 | +           | +           | +           | +   |
| 13    | YNBS/BF01  | <i>Nycteribiidae</i>   | <i>Eucampsipoda africana</i>  | 19  | Baoshan   | 2014 |             |             |             |     |
| 14    | YNBS/BF02  | <i>Nycteribiidae</i>   | <i>Eucampsipoda africana</i>  | 17  | Baoshan   | 2014 |             |             |             |     |
| 15    | YNBS/BF03  | <i>Nycteribiidae</i>   | <i>Eucampsipoda africana</i>  | 13  | Baoshan   | 2014 | +           | +           | +           | +   |
| 16    | YNBS/BF04  | <i>Nycteribiidae</i>   | <i>Eucampsipoda africana</i>  | 10  | Baoshan   | 2014 | +           | +           | +           | +   |
| 17    | YNBS/BF05  | <i>Nycteribiidae</i>   | <i>Eucampsipoda africana</i>  | 6   | Baoshan   | 2014 |             |             |             |     |
| 18    | YNBS/BF06  | <i>Nycteribiidae</i>   | <i>Eucampsipoda africana</i>  | 14  | Baoshan   | 2014 | +           | +           | +           | +   |
| 19    | YNBS/BF07  | <i>Streblidae</i>      | <i>Brachytarsina</i> sp.      | 1   | Baoshan   | 2014 |             |             |             |     |
| 20    | YNMS/BF08  | <i>Nycteribiidae</i>   | <i>Nycteribiidae</i> sp.      | 9   | Mangshi   | 2012 |             |             |             |     |
| 21    | YNMS/BF09  | <i>Nycteribiidae</i>   | <i>Nycteribiidae</i> sp.      | 5   | Mangshi   | 2012 |             |             |             |     |
| 22    | YNMS/BF10  | <i>Nycteribiidae</i>   | <i>Nycteribiidae</i> sp.      | 5   | Mangshi   | 2012 |             |             |             |     |
| 23    | YNML1/BF11 | <i>Nycteribiidae</i>   | <i>Eucampsipoda sundai</i>    | 19  | Mengla    | 2012 | +           | +           | +           | +   |
| 24    | YNML1/BF12 | <i>Nycteribiidae</i>   | <i>Eucampsipoda sundai</i>    | 24  | Mengla    | 2012 | +           | +           | +           | +   |
| 25    | YNML2/BF13 | <i>Nycteribiidae</i>   | <i>Phthiridium</i> sp.        | 4   | Menglian  | 2014 | +           | +           | +           | +   |
| 26    | YNMJ/BF14  | <i>Streblidae</i>      | <i>Brachytarsina kanoi</i>    | 8   | Mojiang   | 2013 |             |             |             |     |
| 27    | YNMJ/BF15  | <i>Nycteribiidae</i>   | <i>Nycteribiidae</i> sp.      | 12  | Mojiang   | 2013 | +           | +           | +           | +   |
| 28    | YNMJ/BF16  | <i>Nycteribiidae</i>   | <i>Nycteribiidae</i> sp.      | 14  | Mojiang   | 2013 | +           | +           | -           | +   |
| 29    | YNTC/BF18  | <i>Nycteribiidae</i>   | <i>Phthiridium</i> sp.        | 5   | Tengchong | 2012 |             |             |             |     |
| 30    | YNTC/BF17  | <i>Nycteribiidae</i>   | <i>Nycteribia</i> sp.         | 10  | Tengchong | 2012 | +           | +           | -           | +   |
| 31    | YNWD/BF19  | <i>Nycteribiidae</i>   | <i>Nycteribia</i> sp.         | 13  | Wanding   | 2012 |             |             |             |     |
| 32    | YNWD/BF20  | <i>Nycteribiidae</i>   | <i>Eucampsipoda inermis</i>   | 8   | Wanding   | 2013 |             |             |             |     |
| 33    | YNWD/BF21  | <i>Streblidae</i>      | <i>Brachytarsina</i> sp.      | 2   | Wanding   | 2013 |             |             |             |     |
| 34    | YNWD/BF22  | <i>Nycteribiidae</i>   | <i>Eucampsipoda africana</i>  | 12  | Wanding   | 2014 |             |             |             |     |
| 35    | YNWD/BF23  | <i>Nycteribiidae</i>   | <i>Eucampsipoda africana</i>  | 11  | Wanding   | 2014 | +           | +           | +           | +   |
| 36    | YNXY/BF24  | <i>Nycteribiidae</i>   | <i>Penicillidia monoceros</i> | 8   | Xiangyun  | 2013 | +           | +           | +           | +   |
| 37    | YNXY/BF25  | <i>Nycteribiidae</i>   | <i>Nycteribia</i> sp.         | 8   | Xiangyun  | 2014 |             |             |             |     |
| 38    | YNXY/BF26  | <i>Nycteribiidae</i>   | <i>Nycteribia</i> sp.         | 10  | Xiangyun  | 2014 |             |             |             |     |
| 39    | YNXY/BF27  | <i>Nycteribiidae</i>   | <i>Nycteribia</i> sp.         | 18  | Xiangyun  | 2014 | +           | +           | +           | +   |
| 40    | YNYD/BF28  | <i>Nycteribiidae</i>   | <i>Phthiridium</i> sp.        | 10  | Yongde    | 2014 | +           | +           | +           | +   |

Note: "+" indicated pools that positive to *Bartonella* detection, while "-" and cell blank indicated negative.

**Table S2.** GenBank accession and information of reference sequences for *gltA*

| <b>gltA accession</b> | <b>Classification</b> | <b>Strain</b> | <b>Country</b> | <b>Host species</b>                       |
|-----------------------|-----------------------|---------------|----------------|-------------------------------------------|
| MK140216              | <i>Bartonella</i> sp. | 110CJ1874312  | Romania        | <i>Miniopterus schreibersii</i>           |
| KF003115              | <i>Bartonella</i> sp. | 1157-3        | Finland        | <i>Eptesicus nilssoni</i>                 |
| KF003122              | <i>Bartonella</i> sp. | 1160-1        | Finland        | <i>Myotis daubentonii</i>                 |
| KF003129              | <i>Bartonella</i> sp. | 2574-1        | Finland        | <i>Myotis daubentonii</i>                 |
| KY629840              | <i>Bartonella</i> sp. | A14           | Mexico         | <i>Desmodus rotundus</i>                  |
| KY629868              | <i>Bartonella</i> sp. | A3            | Mexico         | <i>Desmodus rotundus</i>                  |
| KY629834              | <i>Bartonella</i> sp. | A5            | Mexico         | <i>Desmodus rotundus</i>                  |
| KP100341              | <i>Bartonella</i> sp. | B005          | Vietnam        | <i>Megaderma spasma</i>                   |
| KP100348              | <i>Bartonella</i> sp. | B056          | Vietnam        | <i>Rhinolophus acuminatus</i>             |
| KP100360              | <i>Bartonella</i> sp. | B110          | Vietnam        | <i>Hipposideros larvatus</i>              |
| KM030506              | <i>Bartonella</i> sp. | B23975        | Kenya          | <i>Eidolon helvum</i>                     |
| HM597187              | <i>Bartonella</i> sp. | B29042        | Guatemala      | <i>Desmodus rotundus</i>                  |
| JQ071382              | <i>Bartonella</i> sp. | B32954        | Peru           | <i>Artibeus planirostris</i>              |
| KM030518              | <i>Bartonella</i> sp. | B40005        | Cameroon       | <i>Eidolon helvum</i>                     |
| MK140370              | <i>Bartonella</i> sp. | B44672        | Georgia        | <i>Myotis blythii</i>                     |
| LC483820              | <i>Bartonella</i> sp. | bat2-1        | Japan          | <i>Miniopterus schreibersi fliginosus</i> |
| KJ530742              | <i>Bartonella</i> sp. | Bc37076       | Puerto Rico    | <i>Brachyphylla cavernarum</i>            |
| KX807178              | <i>Bartonella</i> sp. | DMR02005      | USA            | <i>Myotis lucifugus</i>                   |
| KY629879              | <i>Bartonella</i> sp. | DR13          | Mexico         | <i>Desmodus rotundus</i>                  |
| KY629857              | <i>Bartonella</i> sp. | DR22          | Mexico         | <i>Desmodus rotundus</i>                  |
| MN270084              | <i>Bartonella</i> sp. | E1 B23987     | Kenya          | <i>Eidolon helvum</i>                     |
| KM030503              | <i>Bartonella</i> sp. | E2 B23979     | Kenya          | <i>Eidolon helvum</i>                     |
| KM030511              | <i>Bartonella</i> sp. | E2 B24225     | Kenya          | <i>Eidolon helvum</i>                     |
| MN270085              | <i>Bartonella</i> sp. | E2 B39294     | Ghana          | <i>Eidolon helvum</i>                     |
| KM030522              | <i>Bartonella</i> sp. | E2 B40396     | Tanzania       | <i>Eidolon helvum</i>                     |
| MN270087              | <i>Bartonella</i> sp. | E3 B39300     | Ghana          | <i>Eidolon helvum</i>                     |
| KM030516              | <i>Bartonella</i> sp. | E4 B39301     | Ghana          | <i>Eidolon helvum</i>                     |
| KM030513              | <i>Bartonella</i> sp. | E5 B39249     | Ghana          | <i>Eidolon helvum</i>                     |
| KM030520              | <i>Bartonella</i> sp. | E5 B40014     | Tanzania       | <i>Eidolon helvum</i>                     |
| KM030526              | <i>Bartonella</i> sp. | E5 B40908     | Uganda         | <i>Eidolon helvum</i>                     |
| KY629885              | <i>Bartonella</i> sp. | F14           | Mexico         | <i>Pteronotus parnellii</i>               |
| KY629884              | <i>Bartonella</i> sp. | F2            | Mexico         | <i>Pteronotus parnellii</i>               |
| HM545137              | <i>Bartonella</i> sp. | H-556         | Kenya          | <i>Hipposideros vittatus</i>              |
| KY629850              | <i>Bartonella</i> sp. | J3            | Mexico         | <i>Sturnira lilium</i>                    |
| KP010193              | <i>Bartonella</i> sp. | KEL17         | Madagascar     | <i>Eidolon dupreanum</i>                  |
| KY232214              | <i>Bartonella</i> sp. | KP215         | Thailand       | <i>Hipposideros larvatus</i>              |
| AJ871613              | <i>Bartonella</i> sp. | M406          | UK             | <i>Myotis daubentonii</i>                 |
| KY629849              | <i>Bartonella</i> sp. | M9            | Mexico         | <i>Desmodus rotundus</i>                  |
| KF418812              | <i>Bartonella</i> sp. | Mi-BA38       | Nigeria        | <i>Micropteropus</i> sp.                  |
| KJ530743              | <i>Bartonella</i> sp. | Mr37075       | Puerto Rico    | <i>Monophyllus redmani</i>                |
| JF500511              | <i>Bartonella</i> sp. | No.05         | Taiwan         | <i>Miniopterus fuliginosus</i>            |
| JF500513              | <i>Bartonella</i> sp. | No.07         | Taiwan         | <i>Miniopterus fuliginosus</i>            |

|                |                                  |              |                   |                                            |
|----------------|----------------------------------|--------------|-------------------|--------------------------------------------|
| HM363764       | <i>Bartonella</i> sp.            | R-191        | Nigeria           | <i>Rousettus aegyptiacus</i>               |
| MZ208702       | <i>Bartonella</i> sp.            | S833         | China             | <i>Myotis adversus</i>                     |
| KX655835       | <i>Bartonella</i> sp.            | SD117        | China             | <i>Myotis pequinius</i>                    |
| KX655829       | <i>Bartonella</i> sp.            | SD70         | China             | <i>Myotis fimbriatus</i>                   |
| KX655839       | <i>Bartonella</i> sp.            | SD78         | China             | <i>Myotis fimbriatus</i>                   |
| KR822802       | <i>Bartonella hemsundetensis</i> | bat2053      | Finland           | <i>Myotis daubentonii</i>                  |
| KF003137       | <i>Bartonella</i> sp.            | NB-1.2       | Finland           | <i>Siphonaptera</i> sp.                    |
| JX416252       | <i>Bartonella</i> sp.            | 05 01 07     | Laos              | <i>Phthiridium</i> sp. <i>scissa</i> group |
| MK140327       | <i>Bartonella</i> sp.            | 15aCJ353606  | Romania           | <i>Penicillidia conspicua</i>              |
| MK140280       | <i>Bartonella</i> sp.            | 173CJ2734392 | Romania           | <i>Nycteribia kolenatii</i>                |
| JX416251       | <i>Bartonella</i> sp.            | 23 03 04     | Panama            | <i>Strebla diaemi</i>                      |
| MK140298       | <i>Bartonella</i> sp.            | 52bCJ874156  | Romania           | <i>Nycteribia kolenatii</i>                |
| LC461053       | <i>Bartonella</i> sp.            | Batfly-7     | Zambia            | <i>Eucampsipoda africana</i>               |
| MT362931       | <i>Bartonella</i> sp.            | BE-12        | South Korea       | <i>Nycteribia allotopa</i>                 |
| MT362932       | <i>Bartonella</i> sp.            | BE-16        | South Korea       | <i>Penicillidia jenynsii</i>               |
| MT362936       | <i>Bartonella</i> sp.            | BE-58        | South Korea       | <i>Phthiridium hindlei</i>                 |
| JN172074       | <i>Bartonella</i> sp.            | Cg 462       | Equatorial Guinea | <i>Cyclopodia greffi</i>                   |
| JN172035       | <i>Bartonella</i> sp.            | Cg K1-2      | Ghana             | <i>Cyclopodia greffi</i>                   |
| JX416248       | <i>Bartonella</i> sp.            | CWD974       | Mexico            | <i>Trichobius johnsonae</i>                |
| JX416253       | <i>Bartonella</i> sp.            | DR0583       | Dominica          | <i>Trichobius adamsi</i>                   |
| MZ208684       | <i>Bartonella</i> sp.            | FP13         | China             | <i>Nycteribiidae</i> spp.                  |
| MZ208687       | <i>Bartonella</i> sp.            | FP5-1        | China             | <i>Nycteribiidae</i> spp.                  |
| MZ208690       | <i>Bartonella</i> sp.            | FS2-2        | China             | <i>Penicillidia monoceros</i>              |
| JX416239       | <i>Bartonella</i> sp.            | JAE1033      | Philippines       | <i>Leptocyclopodia</i> sp.                 |
| KP010152       | <i>Bartonella</i> sp.            | KEL02-3      | Madagascar        | <i>Cyclopodia dubia</i>                    |
| KP010155       | <i>Bartonella</i> sp.            | KEL04-1      | Madagascar        | <i>Cyclopodia dubia</i>                    |
| KP010164       | <i>Bartonella</i> sp.            | KEL19-1      | Madagascar        | <i>Cyclopodia dubia</i>                    |
| JX416238       | <i>Bartonella</i> sp.            | Mala15       | Malaysia          | <i>Phthiridium fraterna</i>                |
| MH486969       | <i>Bartonella</i> sp.            | Nycteribiid  | China             | bat fly                                    |
| JX416255       | <i>Bartonella</i> sp.            | P2874        | Philippines       | <i>Cyclopodia simulans</i>                 |
| MZ208694       | <i>Bartonella</i> sp.            | SFP4-2       | China             | <i>Nycteribiidae</i> spp.                  |
| MZ388461       | <i>Bartonella</i> sp.            | UM1a         | Malaysia          | bat fly                                    |
| JX416246       | Uncultured bacterium             | Mala11       | Malaysia          | <i>Basilia coronata</i>                    |
| JX416241       | Uncultured bacterium             | ZAG03        | Slovenia          | <i>Basilia nattereri</i>                   |
| JQ695839       | <i>Bartonella</i> sp.            | AS025        | Poland            | <i>Spinturnix myoti</i>                    |
| JQ695840       | <i>Bartonella</i> sp.            | AS067        | Poland            | <i>Spinturnix myoti</i>                    |
| MZ208698       | <i>Bartonella</i> sp.            | MP8-2        | China             | bat mite                                   |
| MH544201       | <i>Bartonella</i> sp.            | la23         | Hungary           | <i>Ixodes ariadnae</i>                     |
| MH578453       | <i>Bartonella hemsundetensis</i> | lv76         | Romania           | <i>Ixodes vespertilionis</i>               |
| NC_007618      | <i>Brucella abortus</i>          | 2308         | Out group         | Out group                                  |
| NZ_WMBQ0100001 | <i>Hyphomicrobium album</i>      | XQ2          | Out group         | Out group                                  |

**Table S3.** GenBank accession and information of reference sequences for MLSA

| <i>gltA</i> | <i>ftsZ</i> | <i>rpoB</i> | Classification                    | Strain  | Country     | Host specis                 | Host order   |
|-------------|-------------|-------------|-----------------------------------|---------|-------------|-----------------------------|--------------|
| NZ_CP015625 | NZ_CP015625 | NZ_CP015625 | <i>Bartonella apis</i>            | BBC0122 | Switzerland | <i>Apis mellifera</i>       | Arthropoda   |
| MZ208687    | MZ208708    | MZ208744    | <i>Bartonella</i> sp.             | FP5-1   | China       | <i>Nycteribiidae</i> spp.   | Arthropoda   |
| MZ208684    | MZ208715    | MZ208744    | <i>Bartonella</i> sp.             | FP13    | China       | <i>Nycteribiidae</i> spp.   | Arthropoda   |
| MZ208698    | MZ208727    | MZ208759    | <i>Bartonella</i> sp.             | MP8-2   | China       | <i>Spinturnicidae</i> spp.  | Arthropoda   |
| KF199896    | KF193408    | KF218220    | <i>Bartonella bovis</i>           | B25100  | Thailand    | <i>Bos taurus</i>           | Artiodactyla |
| AF293392    | AB290192    | AB290188    | <i>Bartonella capreoli</i>        | IBS193  | France      | <i>Capreolus capreolus</i>  | Artiodactyla |
| KM215690    | KM215688    | KM215706    | <i>Bartonella chomelii</i>        | Ru15    | Spain       | <i>Bos taurus</i>           | Artiodactyla |
| KM371042    | KM371051    | KJ909806    | <i>Bartonella dromedarii</i>      | 69C     | Israel      | <i>Camelus dromedarius</i>  | Artiodactyla |
| HG977196    | HG977196    | HG977196    | <i>Bartonella schoenbuchensis</i> | MVT06   | Sweden      | <i>Alces alces</i>          | Artiodactyla |
| NC_014932   | NC_014932   | NC_014932   | <i>Bartonella clarridgeiae</i>    | 73      | France      | <i>Felis catus</i>          | Carnivora    |
| NZ_KL407337 | NZ_KL407337 | NZ_KL407337 | <i>Bartonella rochalimae</i>      | BMGH    | Peru        | <i>Carnivora</i> spp.       | Carnivora    |
| NZ_CP019787 | NZ_CP019787 | NZ_CP019787 | <i>Bartonella</i> sp.             | JB15    | Japan       | <i>Meles anakuma</i>        | Carnivora    |
|             |             |             |                                   |         | French      |                             |              |
| KP715473    | KP715472    | KP715475    | <i>Bartonella rolaini</i>         | C65     | Guiana      | <i>Noctilio albiventris</i> | Chiroptera   |
| KF003115    | KF003121    | KF003118    | <i>Bartonella</i> sp.             | 1157-3  | Finland     | <i>Eptesicus nilssonii</i>  | Chiroptera   |
| KF003129    | KF003135    | KF003132    | <i>Bartonella</i> sp.             | 2574-1  | Finland     | <i>Myotis daubentonii</i>   | Chiroptera   |
| KY629840    | KY629820    | KY629921    | <i>Bartonella</i> sp.             | A14     | Mexico      | <i>Desmodus rotundus</i>    | Chiroptera   |
| KY629834    | KY629824    | KY629925    | <i>Bartonella</i> sp.             | A5      | Mexico      | <i>Desmodus rotundus</i>    | Chiroptera   |
| KY629854    | KY629806    | KY629907    | <i>Bartonella</i> sp.             | D4      | Mexico      | <i>Sturnira ludovici</i>    | Chiroptera   |
| KY629879    | KY629803    | KY629904    | <i>Bartonella</i> sp.             | DR13    | Mexico      | <i>Desmodus rotundus</i>    | Chiroptera   |
| KY629851    | KY629799    | KY629900    | <i>Bartonella</i> sp.             | DR24    | Mexico      | <i>Desmodus rotundus</i>    | Chiroptera   |
|             |             |             |                                   | E2      |             |                             |              |
| KM030511    | KJ999683    | KM215195    | <i>Bartonella</i> sp.             | B24225  | Kenya       | <i>Eidolon helvum</i>       | Chiroptera   |
|             |             |             |                                   | E2      |             |                             |              |
| MN270085    | KJ999686    | MN270150    | <i>Bartonella</i> sp.             | B39294  | Ghana       | <i>Eidolon helvum</i>       | Chiroptera   |
|             |             |             |                                   | E5      |             |                             |              |
| KM030520    | KJ999689    | KM215202    | <i>Bartonella</i> sp.             | B40014  | Tanzania    | <i>Eidolon helvum</i>       | Chiroptera   |
| KM030526    | KJ999694    | MN270154    | <i>Bartonella</i> sp.             | E5      | Uganda      | <i>Eidolon helvum</i>       | Chiroptera   |

|                |                |                |                                      |           |             |                                |                |
|----------------|----------------|----------------|--------------------------------------|-----------|-------------|--------------------------------|----------------|
|                |                |                |                                      | B40908    |             |                                |                |
| KY629884       | KY629797       | KY629898       | <i>Bartonella</i> sp.                | F2        | Mexico      | <i>Pteronotus parnellii</i>    | Chiroptera     |
| KY629882       | KY629796       | KY629897       | <i>Bartonella</i> sp.                | F9        | Mexico      | <i>Pteronotus parnellii</i>    | Chiroptera     |
| KY629850       | KY629793       | KY629894       | <i>Bartonella</i> sp.                | J3        | Mexico      | <i>Sturnira lilium</i>         | Chiroptera     |
| JF500513       | JF500497       | JF500545       | <i>Bartonella</i> sp.                | No.07     | Taiwan      | <i>Miniopterus fuliginosus</i> | Chiroptera     |
| MZ208702       | MZ208734       | MZ208765       | <i>Bartonella</i> sp.                | S833      | China       | <i>Myotis davidii</i>          | Chiroptera     |
| HM363764       | HM363769       | HM363774       | <i>Bartonella</i> sp.                | R-191     | Nigeria     | <i>Rousettus aegyptiacus</i>   | Chiroptera     |
|                |                |                | <i>Candidatus Bartonella</i>         |           |             |                                |                |
| GU168962       | GU168958       | GU168961       | <i>antechini</i>                     | MU1-F19   | Australia   | <i>Antechinus flavipes</i>     | Dasyuromorphia |
| NC_020300      | NC_020300      | NC_020300      | <i>Bartonella australis</i>          | Aust-NH1  | Australia   | <i>Macropus giganteus</i>      | Diprotodontia  |
| HQ444152       | HQ444150       | HQ444151       | <i>Candidatus Bartonella woyliei</i> | WC1       | Australia   | <i>Bettongia penicillata</i>   | Diprotodontia  |
|                |                |                | <i>Candidatus Bartonella</i>         |           |             |                                | Peramelemorpha |
| HQ444165       | HQ444163       | HQ444164       | <i>bandicootii</i>                   | BA1       | Australia   | <i>Oryctolagus cuniculus</i>   | a              |
|                |                |                |                                      |           |             | <i>Perameles</i>               |                |
| NZ_KL503800    | NZ_KL503800    | NZ_KL503800    | <i>Bartonella bacilliformis</i>      | Cond044   | Peru        | <i>bougainville</i>            | Primates       |
|                |                |                |                                      | HeidiMeji |             |                                |                |
| NZ_KK097685    | NZ_KK097685    | NZ_KK097685    | <i>Bartonella bacilliformis</i>      | a         | Peru        | <i>Homo sapiens</i>            | Primates       |
| NZ_KL503803    | NZ_KL503805    | NZ_KL503803    | <i>Bartonella bacilliformis</i>      | Ver097    | Peru        | <i>Homo sapiens</i>            | Primates       |
| CP003784       | CP003784       | CP003784       | <i>Bartonella quintana</i>           | RM-11     | China       | <i>Homo sapiens</i>            | Primates       |
| NC_005955      | NC_005955      | NC_005955      | <i>Bartonella quintana</i>           | Toulouse  | France      | <i>Macaca mulatta</i>          | Primates       |
| NZ_JH725147    | NZ_JH725147    | NZ_JH725147    | <i>Bartonella tamiae</i>             | Th239     | Thailand    | <i>Homo sapiens</i>            | Primates       |
| AB444979       | AB602545       | AB529942       | <i>Bartonella acomydis</i>           | KS2-1     | Egypt       | <i>Homo sapiens</i>            | Rodentia       |
| NZ_CM001557    | NZ_CM001557    | NZ_CM001557    | <i>Bartonella birtlesii</i>          | IBS325    | UK          | <i>Acomys russatus</i>         | Rodentia       |
| NZ_JH725033    | NZ_JH725034    | NZ_JH725033    | <i>Bartonella elizabethae</i>        | F9251     | USA         | <i>Apodemus sylvaticus</i>     | Rodentia       |
| NC_012846      | NC_012846      | NC_012846      | <i>Bartonella grahamii</i>           | as4aup    | Sweden      | <i>Rattus, Bandicota spp.</i>  | Rodentia       |
| KY555066       | KY555065       | KY555068       | <i>Bartonella mastomydis</i>         | 008       | Senegal     | <i>Apodemus sylvaticus</i>     | Rodentia       |
|                |                |                |                                      |           |             | <i>Mastomys</i>                |                |
| AB444978       | AB602543       | AB602555       | <i>Bartonella pachyuromydis</i>      | FN15-2    | Netherlands | <i>erythroleucus</i>           | Rodentia       |
| NZ_WMBQ0100000 | NZ_WMBQ0100000 | NZ_WMBQ0100000 |                                      |           |             |                                |                |
| 1              | 1              | 1              | <i>Hyphomicrobium album</i>          | XQ2       | Outgroup    | Outgroup                       | Outgroup       |

**Table S4.** Primers used in the current study

| Target species             | gene        | Primers            | Sequences (5'-3' )                                      | PCR products (bp) | Reference |
|----------------------------|-------------|--------------------|---------------------------------------------------------|-------------------|-----------|
| Bat ectoparasites          | <i>COI</i>  | LCO1490<br>HCO2198 | GGTCAACAAATCATAAAGATATTGG<br>TAAACTTCAGGGTGACCAAAAAATCA | 710               | [1]       |
| <i>Bartonella</i> bacteria | <i>gltA</i> | <i>gltA</i> -F     | GGGGACCAGCTCATGGTGG                                     | 380               | [2]       |
|                            |             | <i>gltA</i> -R     | AATGCAAAAAGAACAGTAAACA                                  |                   |           |
|                            | <i>rpoB</i> | <i>rpoB</i> -F     | CGCATTGGCTTACTTCGTATG                                   | 851               | [3]       |
|                            |             | <i>rpoB</i> -R     | GTAGACTGATTAGAACGCTG                                    |                   |           |
|                            | <i>ftsZ</i> | <i>ftsZ</i> -F     | ATTAATCTGCAYCGGCCAGATAT                                 | 786               | [4]       |
|                            |             | <i>ftsZ</i> -R     | TCATCAATRGCVCCAAARAT                                    |                   |           |
|                            | ITS         | ITS-F<br>ITS-R     | AGAGGCAGGCAACCACGGTA<br>GCCAAGGCATCCACC                 | 1211-1529         | [5]       |

## References

1. Folmer, O.; Black, M.; Hoeh, W.; Lutz, R.; Vrijenhoek, R. DNA primers for amplification of mitochondrial cytochrome c oxidase subunit I from diverse metazoan invertebrates. *Mol. Mar. Biol. Biotechnol.* **1994**, *3*, 294–299.
2. Norman, A.F.; Regnery, R.; Jameson, P.; Greene, C.; Krause, D.C. Differentiation of *Bartonella*-like isolates at the species level by PCR-restriction fragment length polymorphism in the citrate synthase gene. *J. Clin. Microbiol.* **1995**, *33*, 1797–1803. <https://doi.org/10.1128/jcm.33.7.1797-1803.1995>.
3. .Bai, Y.; Hayman, D.T.S.; McKee, C.; Kosoy, M.Y. Classification of *Bartonella* Strains Associated with Straw-Colored Fruit Bats (*Eidolon helvum*) across Africa Using a Multi-locus Sequence Typing Platform. *PLOS Neglected Trop. Dis.* **2015**, *9*, e0003478–e0003478. <https://doi.org/10.1371/journal.pntd.0003478>.
4. Oliveira, J.G.; Rozental, T.; Guterres, A.; Teixeira, B.R.; Andrade-Silva, B.E.; da Costa-Neto, S.F.; Furtado, M.C.; Moratelli, R.; D'Andrea, P.S.; Lemos, E.R.S. Investigation of *Bartonella* spp. in brazilian mammals with emphasis on rodents and bats from the Atlantic Forest. *Int. J. Parasitol. Parasites Wildl.* **2020**, *13*, 80–89. <https://doi.org/10.1016/j.ijppaw.2020.07.004>.
5. Roux, V.; Raoult, D. The 16S-23S rRNA intergenic spacer region of *Bartonella* (Rochalimaea) species is longer than usually described in other bacteria. *Gene* **1995**, *156*, 107–111. [https://doi.org/10.1016/0378-1119\(94\)00919-j](https://doi.org/10.1016/0378-1119(94)00919-j).

**Table S5** Samples distribution of 10 trapping sites

| NO. | Counties  | Bat ectoparasites    |                   |       |       |       | Total |
|-----|-----------|----------------------|-------------------|-------|-------|-------|-------|
|     |           | Bat flies            |                   | Mites | Ticks | Fleas |       |
|     |           | <i>Nycteribiidae</i> | <i>Streblidae</i> |       |       |       |       |
| 1   | Baoshan   | 79                   | 1                 | 0     | 0     | 1     | 81    |
| 2   | Mangshi   | 13                   | 6                 | 0     | 1     | 0     | 20    |
| 3   | Mengla    | 43                   | 0                 | 33    | 0     | 0     | 76    |
| 4   | Menglai   | 4                    | 0                 | 55    | 0     | 0     | 59    |
| 5   | Mojiang   | 26                   | 8                 | 15    | 2     | 0     | 51    |
| 6   | Shangbai  | 0                    | 0                 | 10    | 0     | 0     | 10    |
| 7   | Tengchong | 15                   | 0                 | 0     | 2     | 0     | 17    |
| 8   | Wanding   | 44                   | 2                 | 0     | 0     | 20    | 66    |
| 9   | Xiangyun  | 44                   | 0                 | 0     | 0     | 0     | 44    |
| 10  | Yongde    | 10                   | 0                 | 0     | 0     | 0     | 10    |

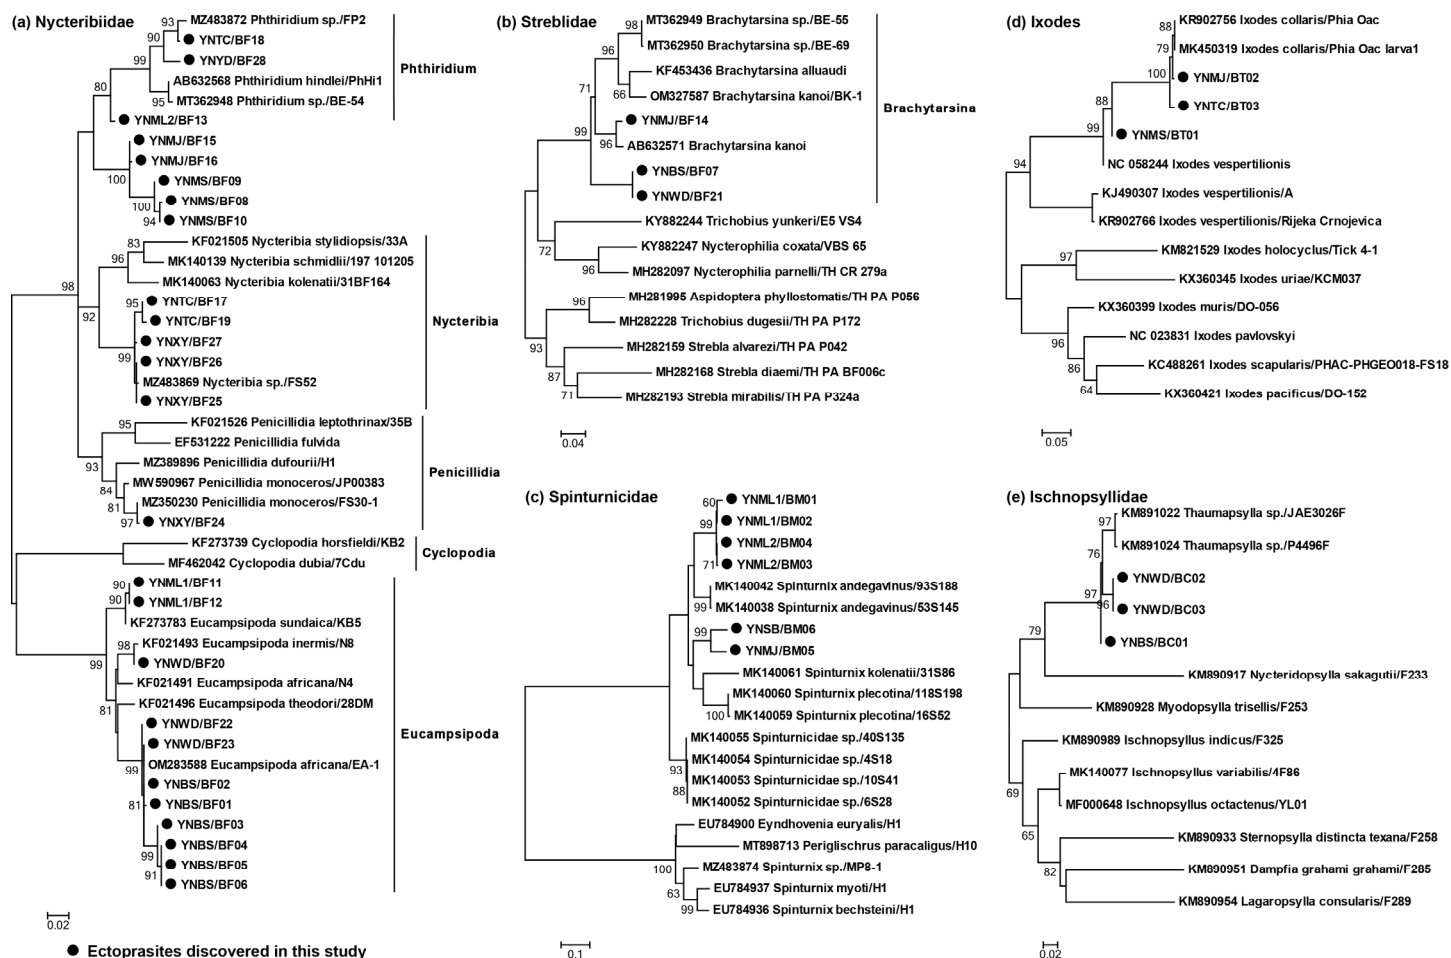

**Figure S1.** Maximum likelihood tree for 40 mixed pools of bat ectoparasites based on the partial nucleotide sequence of the *COI* gene. Five families of bat-specific ectoparasites were contained: (a) *Nycteribiidae*, (b) *Streblidae*, (c) *Spinturnicidae*, (d) *Ixodidae*: *Ixodes*, (e) *Ischnopsyllidae*. The ectoparasites newly discovered in the current study are marked with solid black circles within the phylogenetic tree.
